# Supplementary material for: CYPstrate: A Set of Machine Learning Models for the Accurate Classification of Cytochrome P450 Enzyme Substrates and Non-Substrates
Source: MDPI journal article supplement (doi:10.3390/molecules26154678), 2021-08-02
Supplement: s1 [file s1]

# CYPstrate: A set of machine learning models for the accurate classification of cytochrome P450 enzyme substrates and non-substrates

Malte Holmer<sup>1</sup>, Christina de Bruyn Kops<sup>1</sup>, Conrad Stork<sup>1</sup> and Johannes Kirchmair<sup>1,2\*</sup>

<sup>1</sup> Center for Bioinformatics (ZBH), Department of Informatics, Universität Hamburg, 20146 Hamburg, Germany; malte.holmer@studium.uni-hamburg.de (M.H.); kops@zbh.uni-hamburg.de (C.d.B.K.); stork@zbh.uni-hamburg.de (C.S.)

<sup>2</sup> Division of Pharmaceutical Chemistry, Department of Pharmaceutical Sciences, University of Vienna, 1090 Vienna, Austria.

\* Correspondence: johannes.kirchmair@univie.ac.at

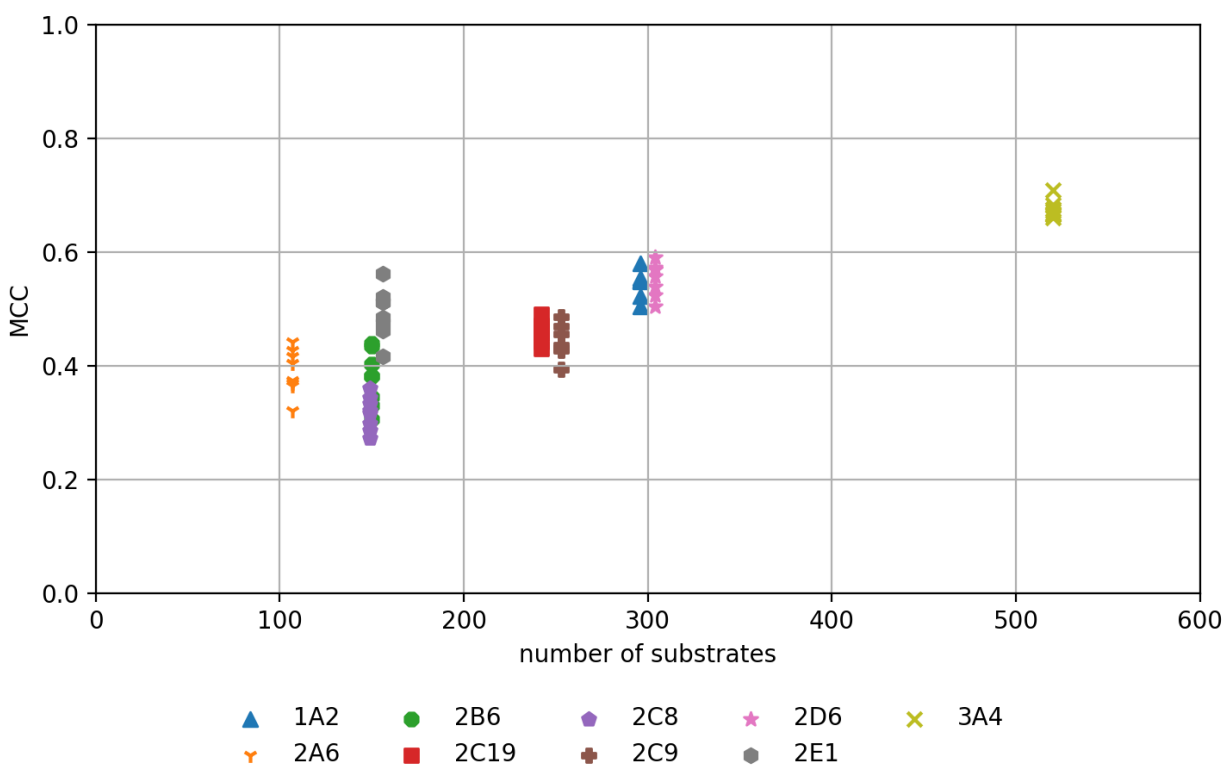

**Figure S1:** MCCs (median over the 5 folds of the CV) plotted against the number of substrates in a training set, for all 72 single classifiers generated for the nine CYP isozymes by the combination of two machine learning algorithms and four descriptor sets.

**Table S1.** Distribution of substrates and non-substrates per CYP isozyme and data set.

| CYP  | Class         | Tian et al.<br>training set <sup>1</sup> | Tian et al.<br>test set <sup>1</sup> | Hunt et al.<br>data set <sup>1</sup> | Core data set | Core data set<br>(training) | Core data set<br>(test) |
|------|---------------|------------------------------------------|--------------------------------------|--------------------------------------|---------------|-----------------------------|-------------------------|
| 1A2  | non-substrate | 1361                                     | 100                                  | -                                    | 1428          | 1142                        | 286                     |
|      | substrate     | 271                                      | 24                                   | 201                                  | 296           | 237                         | 59                      |
| 2A6  | non-substrate | 1527                                     | 100                                  | -                                    | 1607          | 1285                        | 322                     |
|      | substrate     | 105                                      | 6                                    | -                                    | 107           | 86                          | 21                      |
| 2B6  | non-substrate | 1481                                     | 100                                  | -                                    | 1561          | 1248                        | 313                     |
|      | substrate     | 151                                      | 4                                    | -                                    | 150           | 120                         | 30                      |
| 2C8  | non-substrate | 1490                                     | 100                                  | -                                    | 1565          | 1252                        | 313                     |
|      | substrate     | 142                                      | 12                                   | 107                                  | 149           | 119                         | 30                      |
| 2C9  | non-substrate | 1406                                     | 100                                  | -                                    | 1469          | 1175                        | 294                     |
|      | substrate     | 226                                      | 28                                   | 194                                  | 253           | 202                         | 51                      |
| 2C19 | non-substrate | 1414                                     | 100                                  | -                                    | 1481          | 1184                        | 297                     |
|      | substrate     | 218                                      | 20                                   | 184                                  | 242           | 194                         | 48                      |
| 2D6  | non-substrate | 1362                                     | 100                                  | -                                    | 1425          | 1140                        | 285                     |
|      | substrate     | 270                                      | 21                                   | 203                                  | 304           | 243                         | 61                      |
| 2E1  | non-substrate | 1487                                     | 100                                  | -                                    | 1556          | 1244                        | 312                     |
|      | substrate     | 145                                      | 6                                    | 106                                  | 156           | 125                         | 31                      |
| 3A4  | non-substrate | 1157                                     | 100                                  | -                                    | 1239          | 991                         | 248                     |
|      | substrate     | 475                                      | 32                                   | 304                                  | 520           | 416                         | 104                     |

<sup>1</sup> Class label distributions were analyzed prior to the processing of the data.

**Table S2. RDKit 2D descriptors ranked by at least one RF classifier among the five most important features.**

| Descriptor name        | Description                                                                                                                                                                                                         |
|------------------------|---------------------------------------------------------------------------------------------------------------------------------------------------------------------------------------------------------------------|
| EState_VSA10           | Approximated van der Waals surface area of all atoms with an EState value [31] within a given interval.                                                                                                             |
| EState_VSA2            |                                                                                                                                                                                                                     |
| FractionCSP3           | Fraction of C atoms that are sp <sup>3</sup> hybridized.                                                                                                                                                            |
| Kappa1                 | First kappa index characterizing aspects of the molecular shape by comparing a molecule to its possible extreme shapes [42].                                                                                        |
| MinPartialCharge       | Minimum partial charge of an atom calculated by the iterative procedure [43].                                                                                                                                       |
| MolLogP                | Log of the octanol/water partition coefficient calculated by an atomic contribution model [44].                                                                                                                     |
| NumAromaticCarbocycles | Number of aromatic carbocycles for a molecule.                                                                                                                                                                      |
| NumAromaticRings       | Number of aromatic rings for a molecule.                                                                                                                                                                            |
| NumHDonors             | Number of Hydrogen Bond Donors                                                                                                                                                                                      |
| PEOE_VSA1              | Approximated van der Waals surface area of all atoms with a partial charge within a given interval. The partial charge is calculated by the Partial Equalization of Orbital Electronegativities (PEOE) method [43]. |
| SMR_VSA1               | Approximated van der Waals surface area of all atoms with a molecular refractivity within a given interval ( $-\infty < x < 1.29$ ). Molecular refractivity is calculated as reported in Ref [44].                  |
| SMR_VSA5               |                                                                                                                                                                                                                     |
| SMR_VSA6               |                                                                                                                                                                                                                     |
| SMR_VSA7               |                                                                                                                                                                                                                     |
| SlogP_VSA3             | Approximated van der Waals surface area of all atoms with a logP within a given interval. Log of the octanol/water partition coefficient (logP) is calculated as reported in Refs [44,45].                          |
| SlogP_VSA5             |                                                                                                                                                                                                                     |
| TPSA                   | Implementation of the topological polar surface area descriptor of Ertl et al. [45].                                                                                                                                |

|                     |                                                                                                    |
|---------------------|----------------------------------------------------------------------------------------------------|
| <b>VSA_EState10</b> |                                                                                                    |
| <b>VSA_EState3</b>  | Approximated van der Waals surface area of all atoms with an EState value within a given interval. |
| <b>VSA_EState6</b>  |                                                                                                    |
| <b>fr_Al_OH</b>     | Number of aliphatic hydroxyl groups.                                                               |
| <b>fr_NH0</b>       | Number of tertiary amines.                                                                         |
| <b>fr_benzene</b>   | Number of benzene rings.                                                                           |
| <b>qed</b>          | Weighted quantitative estimate of drug-likeness (QED <sub>w</sub> ) [46].                          |
